# Supplementary material for: Miniaturization of CRISPR/Cas12-Based DNA Sensor Array by Non-Contact Printing
Source: MDPI journal article supplement (doi:10.3390/mi15010144), 2024-01-17
Supplement: s1 [file s1]

# Miniaturization of CRISPR/Cas12-Based DNA Sensor Array by Non-Contact Printing

Hiroki Shigemori <sup>1,2</sup>, Satoshi Fujita <sup>1</sup>, Eiichi Tamiya <sup>1,3</sup> and Hidenori Nagai <sup>1,2,\*</sup>

<sup>1</sup> Advanced Photonics and Biosensing Open Innovation Laboratory (PhotoBIO-OIL), National Institute of Advanced Industrial Science and Technology (AIST), Photonics Center Osaka University, 2-1 Yamada-Oka, Suita 565-0871, Osaka, Japan; h.shigemori@aist.go.jp (H.S.); s-fujita@aist.go.jp (S.F.); tamiya.handai-oil@aist.go.jp (E.T.)

<sup>2</sup> Graduate School of Human Development and Environment, Kobe University, 3-11 Tsurukabuto, Nada-ku, Kobe 657-0011, Hyogo, Japan

<sup>3</sup> Institute of Scientific and Industrial Research (SANKEN), Osaka University, 8-1 Mihogaoka, Ibaraki 567-0047, Osaka, Japan

\* Correspondence: hide.nagai@aist.go.jp; Tel.: +81-72-751-9527

|                                                                                                                                                 |    |
|-------------------------------------------------------------------------------------------------------------------------------------------------|----|
| Figure S1: Process to wash the bottom surface of the 96-well .....                                                                              | S2 |
| Figure S2: Extraction workflow of the Cas12-immobilized region from the FAM image .....                                                         | S2 |
| Figure S3: HEX-fluorescence response to target dsDNA concentration in each printing volume condition .....                                      | S3 |
| Figure S4: One-pot triple-target dsDNA detection on the non-contact-patterned SPCC-based sensor array fabricated by the optimized process ..... | S4 |
| Figure S5: Proximal spot-dispensing model of inkjet patterning and the calculation method of its spot-density .....                             | S4 |
| Table S1: Oligonucleotide sequences of amplified target dsDNA, primer, synthesized target dsDNA, crRNA, FAM-crRNA, and ssDNA reporter .....     | S5 |
| Table S2: Components of PCR mixture .....                                                                                                       | S6 |
| Table S3: Conditions of non-contact printing of the Cas12-crRNA droplet .....                                                                   | S6 |

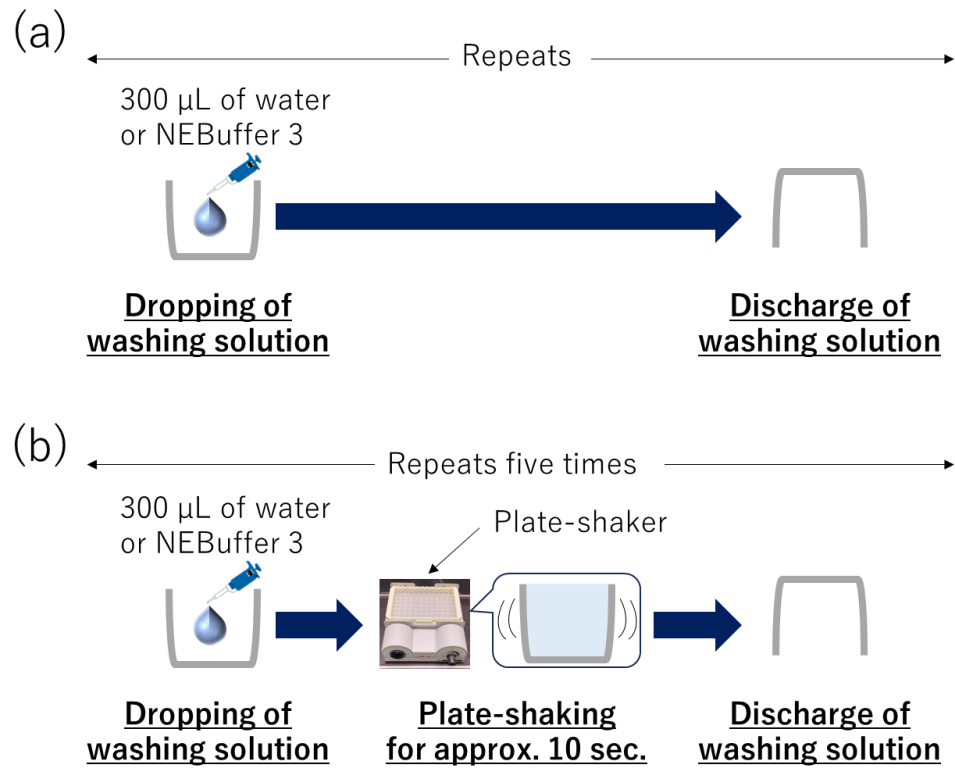

**Figure S1.** Process to wash the bottom surface of the 96-well: (a) 3.3 section and later, (b) Up to 3.2 section

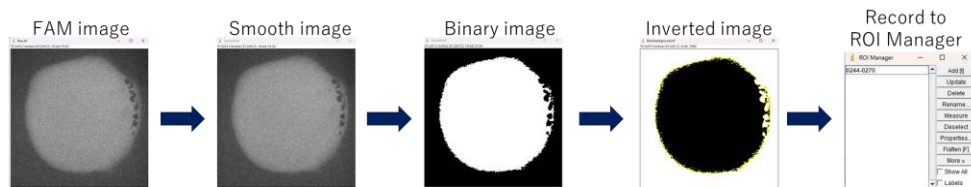

**Figure S2.** Extraction workflow of the Cas12-immobilized region from the FAM image

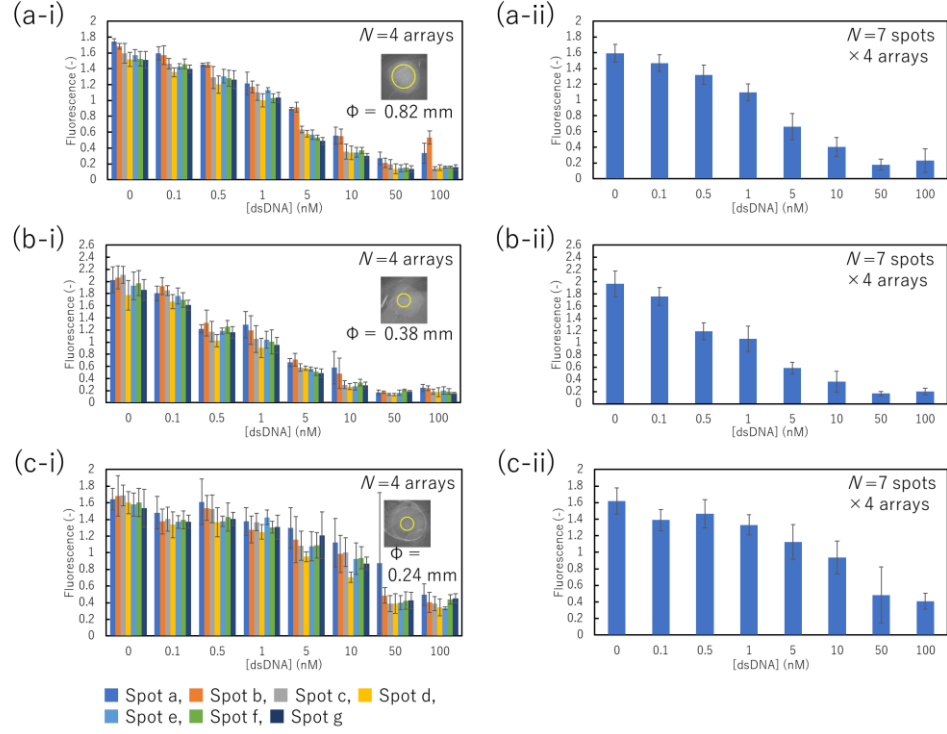

**Figure S3.** HEX-fluorescence response to target dsDNA concentration in each printing volume condition: (a-i, b-i and c-i) HEX-fluorescence intensity at the center part of each spot (the yellow-circled position) in 40, 20 and 10 nL printing volume condition, respectively, (a-ii, b-ii and c-ii) HEX-fluorescence intensity of each [dsDNA] in 40, 20 and 10 nL printing volume condition, respectively

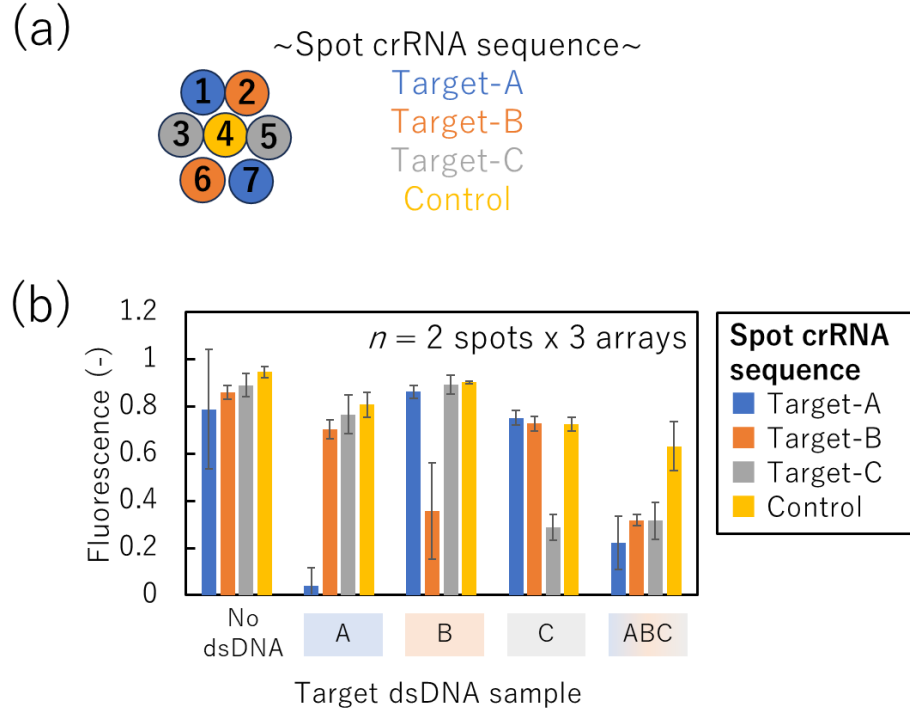

**Figure S4.** One-pot triple-target dsDNA detection on the non-contact-patterned SPCC-based sensor array fabricated by the optimized process: (a) crRNA sequence of each spot, (b) HEX-fluorescence intensity in each crRNA sequence condition after the incubation of each dsDNA sample (fluorescence intensity was extracted at the region with a radius of 0.71 mm around the center of each spot)

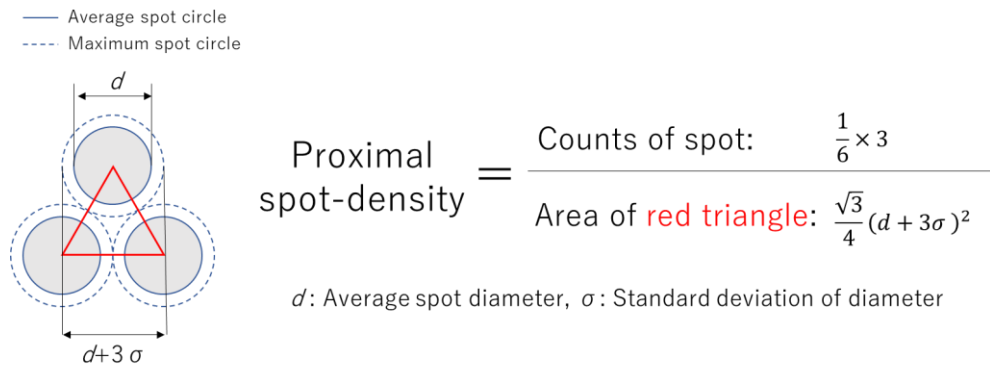

**Figure S5.** Proximal spot-dispensing model of inkjet patterning and the calculation method of its spot-density

**Table S1.** Oligonucleotide sequences of amplified target dsDNA, primer, synthesized target dsDNA, crRNA, FAM-crRNA, and ssDNA reporter (the [ACC] sequence of target dsDNA amplicon was converted to [TTT] (part of the PAM sequence) by forward primer; Underline indicates the targeted region of the dsDNA and the target-recognizing region of the crRNA; FAM, HEX, AmC7, and BHQ1 stand for 6-carboxyfluorescein, Hexachloro-fluorescein, Amino Modifier C7 and Black Hole Quencher 1).

| Amplified region of target dsDNA (sense strand) | Sequence (5'→3')                                                                                                                                                                                           |
|-------------------------------------------------|------------------------------------------------------------------------------------------------------------------------------------------------------------------------------------------------------------|
| pEGFP-N1                                        | CACCTACGGCAAGCTG[ACC]CTGAAGTTCATCTGCACCACCGGCAA-GCTGCCCCGTGCCCTGGCCACCCCTCGTGAC-CACCTGACCTACGGCGTGCACTGCTTCAGCCGCTACCCCGACCACATGAAGCAGCAGCACTTC TTCAAGTCCGCCATGCCCGAAGGCTACGTCCAGGAGCGCACCATCTTCTTCAAGGACG |
| pVenus-N1                                       | CACCTACGGCAAGCTG[ACC]CTGAAGCTGATCTGCACCACCGGCAA-GCTGCCCCGTGCCCTGGCCACCCCTCGTGAC-CACCTGAGCTACGGCGTGCACTGCTTCGCCCGCTACCCCGACCACATGAAGCAGCAGCACTTC TTCAAGTCCGCCATGCCCGAAGGCTACGTCCAGGAGCGCACCATCTTCTTCAAGGACG |
| <b>Primer</b>                                   |                                                                                                                                                                                                            |
| Forward                                         | CACCTACGGCAAGCTG[TTT]CTGA                                                                                                                                                                                  |
| Reverse                                         | CGTCCTTGAAGAAGATGGTGCGC                                                                                                                                                                                    |
| <b>Synthesized target dsDNA</b>                 |                                                                                                                                                                                                            |
| Target-A                                        | AATTGCACAATTTGCTCCAAGTGCCTCTGCATTCTTTGGAATGT                                                                                                                                                               |
| Target-B                                        | AGGAGTGTCTTTTCAATTACTTGGGTGTGACCCCTGAAGACTCGGA                                                                                                                                                             |
| Target-C                                        | AATTGCACAATTTGCCCCAGCGCTTCAGCGTTCTTCGGAATGTGCGC                                                                                                                                                            |
| <b>crRNA</b>                                    |                                                                                                                                                                                                            |
| For pVenus-N1                                   | UAAUUUCUACUAAGUGUAGAUUGAAGCUGAUCUGCACC                                                                                                                                                                     |
| <b>FAM-crRNA</b>                                |                                                                                                                                                                                                            |
| For pVenus-N1                                   | UAAUUUCUACUAAGUGUAGAUUGAAGCUGAUCUGCACC -FAM                                                                                                                                                                |
| Negative control                                | UAAUUUCUACUAAGUGUAGAUUGAAGUAGAUUGGCAGCAC -FAM                                                                                                                                                              |
| For target-A                                    | UAAUUUCUACUAAGUGUAGAUUCCAAGUGCCUCUGCAUUC -FAM                                                                                                                                                              |
| For target-B                                    | UAAUUUCUACUAAGUGUAGAUAAUUACUUGGGUGUGACCCU -FAM                                                                                                                                                             |
| For target-C                                    | UAAUUUCUACUAAGUGUAGAUCCCCAGCGCUUCAGCGUUC -FAM                                                                                                                                                              |
| <b>ssDNA reporter</b>                           |                                                                                                                                                                                                            |
| HEX-Poly NH2-20nt                               | T- HEX-TTTTTTTTTTTTTTTTTTTT-AmC7                                                                                                                                                                           |
| HEX-Poly NH2-40nt                               | T- HEX-TTTTTTTTTTTTTTTTTTTTTTTTTTTTTTTTTTTT -AmC7                                                                                                                                                          |
| HEX-Poly NH2-60nt                               | T- HEX-TTTTTTTTTTTTTTTTTTTTTTTTTTTTTTTTTTTTTTTT -AmC7                                                                                                                                                      |
| HEX-Poly NH2-80nt                               | T- HEX-TTTTTTTTTTTTTTTTTTTTTTTTTTTTTTTTTTTTTTTTTTTTTTTTTTTTTTTTTTTT -AmC7                                                                                                                                  |

HEX-Poly T- HEX-  
 NH2-100nt TTTT...TTT-AmC7  
 F-Q ssDNA re- HEX-TTATT-BHQ1  
 porter

**Table S2.** Components of PCR mixture. The reagents were added to tubes in order from top to bottom of the list. The 10x Fast Buffer I and dNTP mixture were part of the SpeedSTAR HS Polymerase kit

| Reagent                    | Concentration          |
|----------------------------|------------------------|
| Nuclease-free water        | —                      |
| 10x Fast buffer I          | 1x                     |
| dNTP mixture (2.5 mM each) | 200 μM                 |
| Forward primer             | 0.4 μM                 |
| Reverse primer             | 0.4 μM                 |
| SpeedSTAR HS Polymerase    | 25 mU μL <sup>-1</sup> |
| pVenus-N1 plasmid          | 50 fg μL <sup>-1</sup> |

**Table S3.** Conditions of non-contact printing of the Cas12-crRNA droplet

| Conditions                                                              | Before 3.4. section                   | 3.4. and 3.5. section |
|-------------------------------------------------------------------------|---------------------------------------|-----------------------|
| Syringe pressuring speed                                                | Initiate<br>( $\mu\text{L/s}$ )       | 1<br>0.2              |
|                                                                         | Maximum<br>( $\mu\text{L/s}$ )        | 10<br>1               |
|                                                                         | Acceleration<br>( $\mu\text{L/s}^2$ ) | 200<br>100            |
| Pre-pressure before the opening of the solenoid valve ( $\mu\text{L}$ ) | 0.65                                  |                       |
| Opening time of the solenoid valve ( $\mu\text{s}$ )                    | 650                                   |                       |
| Printing volume (nL)                                                    | 50                                    | 10 or 20 or 40        |

**Table S4.** Correspondence table of positive (>LOD) / negative (<LOD) samples and their test results, and calculation results of sensitivity (positive results ratio from positive samples) and specificity (negative results ratio from negative samples).

**Table S4a.** Results in 40 nL-printing volume condition (0, 0.1, 0.5 nM dsDNA samples are defined as negative; 1, 5, 10, 50, 100 nM dsDNA samples are defined as positive)

|                                 | Positive samples (>LOD)  | Negative Samples (<LOD) |
|---------------------------------|--------------------------|-------------------------|
| Positive results (>3 $\sigma$ ) | 20                       | 1                       |
| Negative results (<3 $\sigma$ ) | 0                        | 11                      |
|                                 | <u>Sensitivity: 100%</u> | <u>Specificity: 92%</u> |

**Table S4b.** Results in 20 nL-printing volume condition (0, 0.1, 0.5 nM dsDNA samples are defined as negative; 1, 5, 10, 50, 100 nM dsDNA samples are defined as positive)

|                                 | Positive samples (>LOD)  | Negative Samples (<LOD) |
|---------------------------------|--------------------------|-------------------------|
| Positive results (>3 $\sigma$ ) | 20                       | 4                       |
| Negative results (<3 $\sigma$ ) | 0                        | 8                       |
|                                 | <u>Sensitivity: 100%</u> | <u>Specificity: 67%</u> |

**Table S4c.** Results in 10 nL-printing volume condition (0, 0.1, 0.5, 1 nM dsDNA samples are defined as negative; 5, 10, 50, 100 nM dsDNA samples are defined as positive)

|                                 | Positive samples (>LOD)  | Negative Samples (<LOD)  |
|---------------------------------|--------------------------|--------------------------|
| Positive results (>3 $\sigma$ ) | 16                       | 0                        |
| Negative results (<3 $\sigma$ ) | 0                        | 16                       |
|                                 | <u>Sensitivity: 100%</u> | <u>Specificity: 100%</u> |
